# Supplementary material for: Single-cell analysis reveals sexually dimorphic repertoires of Interferon-γ and IL-17A producing T cells in salivary glands of Sjögren’s syndrome mice
Source: PubMed Central journal article supplement (PMC5624952; doi:10.1038/s41598-017-12627-6), 2017-10-02
Supplement: 41598_2017_12627_MOESM1_ESM.pdf [file 41598_2017_12627_MOESM1_ESM.pdf]

**Single-cell analysis reveals sexually dimorphic repertoires of Interferon- $\gamma$  and IL-17A producing T cells in salivary glands of Sjögren's syndrome mice**

Arun Wanchoo<sup>1</sup>, Alexandria Voigt<sup>1</sup>, Sukesh Sukumaran<sup>2</sup>, Carol M. Stewart<sup>3,5</sup>, Indraneel Bhattacharya<sup>3,5</sup>, \*Cuong Q. Nguyen<sup>1,4,5</sup>

<sup>1</sup>Department of Infectious Diseases and Pathology, College of Veterinary Medicine, University of Florida, Gainesville Florida, USA, <sup>2</sup>Rheumatology Section, University of Arkansas for Medical Sciences, Arkansas Children's Hospital, Little Rock Arkansas, USA, <sup>3</sup>Department of Oral and Maxillofacial Diagnostic Sciences, <sup>4</sup>Department of Oral Biology, <sup>5</sup>Center of Orphaned Autoimmune Diseases, University of Florida, Gainesville Florida, USA

**Table 1. Hypervariable regions of IFN- $\gamma$  expressing T cells from B6 mice**

| Sex                       | Age (wk) | T cell | TRAV  | CDR3 $\alpha$        | TRAJ | %   | TRBV | CDR3 $\beta$            | TRBD         | TRBJ | %    |  |
|---------------------------|----------|--------|-------|----------------------|------|-----|------|-------------------------|--------------|------|------|--|
| M                         | 32       | Th1    | 6-1   | CKGMRGGFRIFPFQKKS    | 30   | 5.9 | 12-2 | CISENASAEGGP            |              | 2-5  | 16.7 |  |
| F                         | 56       | Th1    | 7N-4  | CGHRYTLGRCSGMFL      | 36   | 5.9 | 9    | CGWRKSCVASECFLGRFG      |              | 1-7  | 16.7 |  |
| F                         | 56       | Th1    |       |                      |      |     | 4    | CLCFC                   | 1            |      | 16.7 |  |
| M                         | 60       | Th1    |       |                      |      |     | 13-1 | CRNILRGSREVK            | 1            |      | 16.7 |  |
| M                         | 60       | Th1    |       |                      |      |     | 12-1 | CCYNVDLFPFS             |              |      | 16.7 |  |
| M                         | 60       | Th1    |       |                      |      |     | 21   | CHGWS*GRRHLANKRATHLAPFG |              | 2-5  | 16.7 |  |
| M                         | 51       | Tc1    | 1     | CTKKVIQHLRDFG        | 53   | 5.9 |      |                         |              |      |      |  |
| F                         | 56       | Tc1    | 2     | CPTSFLLHSLYPIFS      | 21   | 5.9 |      |                         |              |      |      |  |
| F                         | 60       | Th1    | 3D-3  | CKDPQPNIKWCLGNPL     | 21   | 5.9 |      |                         |              |      |      |  |
| M                         | 60       | Th1    | 4-4   | CRSRLSNLRHRLRF       |      | 5.9 |      |                         |              |      |      |  |
| F                         | 60       | Th1    | 5-1   | CLYSANKKGCF          | 32   | 5.9 |      |                         |              |      |      |  |
| F                         | 60       | Th1    | 6-4   | CAAWWKIQCIRVIFRPSGVW | 1    | 5.9 |      |                         |              |      |      |  |
| M                         | 60       | Th1    | 6D-6  | CEPGLPTALIRKLF       | 52   | 5.9 |      |                         |              |      |      |  |
| F                         | 56       | Th1    | 7     | CSLT*PPSL*LGK        | 2    | 5.9 |      |                         |              |      |      |  |
| M                         | 32       | Th1    | 12-3  | CSVTHKDSLVSNGNPSF    | 31   | 5.9 |      |                         |              |      |      |  |
| F                         | 60       | Th1    | 12D-2 | CAQGGCLITL           | 34   | 5.9 |      |                         |              |      |      |  |
| F                         | 60       | Th1    | 12D-3 | CMRYCEPFL            | 61   | 5.9 |      |                         |              |      |      |  |
| M                         | 60       | Th1    | 13-3  | CLPPLLPWLSGVFRLF     | 45   | 5.9 |      |                         |              |      |      |  |
| M                         | 60       | Th1    | 14-2  | CFYYCLSDFS           | 19   | 5.9 |      |                         |              |      |      |  |
| M                         | 32       | Th1    | 19    | CKKYPKRF             | 13   | 5.9 |      |                         |              |      |      |  |
| F                         | 56       | Th1    | 1     | CAVRSGQILLNTCSRFG    | 25   | 5.9 |      |                         |              |      |      |  |
| <b>Shannon's Entropy:</b> |          |        |       | <b>4.09</b>          |      |     |      |                         | <b>2.59</b>  |      |      |  |
| <b>Simpson's Index:</b>   |          |        |       | <b>0.000</b>         |      |     |      |                         | <b>0.000</b> |      |      |  |

Listed are translated CDR3 amino acid sequences from IFN- $\gamma$  producing T cells isolated from the B6 mouse indicating the Sex, Age (in weeks), T cell (Th indicates CD4 expression, Tc indicates CD8 expression), TRAV (unambiguous IMGT gene name of the TRAV), TRAJ, TRBV, TRBJ and the % (percent of the repertoire) of the individual instance of each clone. Shannon's Entropies and Simpson's indices indicated are calculated from the repertoire of the CDR3 $\alpha$  and the CDR3 $\beta$  separately.

**Table 2. Hypervariable regions of IL-17A expressing T cells from B6 mice**

| Sex                       | Age (wk) | T cell | TRAV         | CDR3 $\alpha$       | TRAJ | %   | TRBV | CDR3 $\beta$          | TRBD | TRBJ | %   |
|---------------------------|----------|--------|--------------|---------------------|------|-----|------|-----------------------|------|------|-----|
| F                         | 56       | Th17   | 12D-2        | CTSVDYLRIILLSHLSFA  | 41   | 4.2 | 19   | CPSVPALGKR            |      | 1-3  | 5.9 |
| F                         | 56       | Th17   | 14D-3/DV8    | CLVNSSLQFFR         | 61   | 4.2 | 2    | CSRSVRRDEGRAGL        |      | 1-1  | 5.9 |
| F                         | 60       | Th17   | 20           | CWAELPTRPRGNSPAFG   | 13   | 4.2 | 3    | CTSWRHSWGYF           |      | 1-1  | 5.9 |
| F                         | 56       | Tc17   | 21/DV12      | CAPSQRNPLRSRFL      | 42   | 4.2 | 3    | CIKEEIDFQ             |      |      | 5.9 |
| F                         | 60       | Th17   |              | CGVWQFDSFW          |      | 4.2 | 1    | CAHV FVRDGN TFG       | 2    | 1-1  | 5.9 |
| F                         | 56       | Tc17   |              |                     |      |     | 2    | CN FHN GARFELKCFRFG   | 2    | 2-5  | 5.9 |
| M                         | 32       | Th17   |              |                     |      |     | 12-1 | CLPIYLFFV             | 1    |      | 5.9 |
| F                         | 56       | Tc17   |              |                     |      |     | 12-1 | CLR IPLTSYFA          | 1    |      | 5.9 |
| M                         | 51       | Th17   |              |                     |      |     | 16   | CLPSTVGIAPLPNRGLAIRFG |      | 2-1  | 5.9 |
| F                         | 60       | Th17   |              |                     |      |     | 17   | CFHSGFAFN YGNFFR      |      | 1-3  | 5.9 |
| M                         | 51       | Th17   |              |                     |      |     | 20   | CGHV RACWKAFN         | 1    | 1-6  | 5.9 |
| F                         | 60       | Th17   |              |                     |      |     | 20   | CISAAWNMEALFG         |      | 1-7  | 5.9 |
| M                         | 60       | Tc17   |              |                     |      |     | 21   | CRTSTLGTLRHHLRLGVLFG  |      | 1-2  | 5.9 |
| F                         | 60       | Th17   |              |                     |      |     | 24   | CCCESLLHLFF           |      |      | 5.9 |
| F                         | 56       | Tc17   |              |                     |      |     | 26   | CMIFTFIFYYSIHFP       |      | 2-2  | 5.9 |
| F                         | 56       | Th17   |              |                     |      |     | 31   | CAWSLHRRNER           | 1    | 1-4  | 5.9 |
| F                         | 60       | Th17   |              |                     |      |     | 31   | CSRSQPRTTGLFV         |      | 2-3  | 5.9 |
| M                         | 32       | Th17   | 6D-6         | CAIGTEGRSGYF        | 31   | 4.2 |      |                       |      |      |     |
| F                         | 60       | Th17   | 13D-2        | CETSFKPFYKFSFG      | 23   | 4.2 |      |                       |      |      |     |
| F                         | 60       | Th17   | 15D-2/DV6D-2 | CGMADCHTYHLFG       | 24   | 4.2 |      |                       |      |      |     |
| F                         | 56       | Tc17   | 3-4          | CINEKDQWLPGVRFG     | 34   | 4.2 |      |                       |      |      |     |
| F                         | 60       | Th17   | 14D-3/DV8    | CLAYSSTFSFP         | 36   | 4.2 |      |                       |      |      |     |
| F                         | 60       | Th17   | 6D-4         | CLMRASP PARVFN      | 57   | 4.2 |      |                       |      |      |     |
| M                         | 51       | Th17   | 15D-2/DV6D-2 | CLTGVAVKGFG         | 49   | 4.2 |      |                       |      |      |     |
| F                         | 56       | Tc17   | 10           | CMGPNHHVFS          | 18   | 4.2 |      |                       |      |      |     |
| F                         | 60       | Th17   | 4N-4         | CPFPWFGIFG          |      | 4.2 |      |                       |      |      |     |
| F                         | 60       | Tc17   | 2            | CPRDLTESYIVHCGLR    | 1    | 4.2 |      |                       |      |      |     |
| F                         | 60       | Th17   | 7-5          | CQEMERP NRGVSGRGGNF | 25   | 4.2 |      |                       |      |      |     |
| F                         | 60       | Th17   | 1            | CRFK                |      | 4.2 |      |                       |      |      |     |
| F                         | 56       | Tc17   | 5-1          | CRRFGSATFG          | 58   | 4.2 |      |                       |      |      |     |
| M                         | 60       | Tc17   | 5            | CSLLWR-VVFP         | 46   | 4.2 |      |                       |      |      |     |
| M                         | 51       | Th17   | 3-3          | CSTNGPGWQVFR        | 45   | 4.2 |      |                       |      |      |     |
| F                         | 60       | Tc17   | 9N-3         | CSYVEERDAPFG        | 23   | 4.2 |      |                       |      |      |     |
| F                         | 56       | Th17   | 10           | CTSGY TDFV          | 11   | 4.2 |      |                       |      |      |     |
| F                         | 60       | Th17   | 6-2          | CTTNILYDLKRETFG     | 52   | 4.2 |      |                       |      |      |     |
| M                         | 60       | Th17   | 12D-2        | -                   |      | 4.2 |      |                       |      |      |     |
| <b>Shannon's Entropy:</b> |          |        |              | <b>4.59</b>         |      |     |      | <b>4.09</b>           |      |      |     |
| <b>Simpson's Index:</b>   |          |        |              | <b>0.000</b>        |      |     |      | <b>0.000</b>          |      |      |     |

Listed are translated CDR3 amino acid sequences from IL-17 producing T cells isolated from the B6 mouse

indicating the Sex, Age (in weeks), T cell (Th indicates CD4 expression, Tc indicates CD8 expression), TRAV (unambiguous IMGT gene name of the TRAV), TRAJ, TRBV, TRBJ and the % (percent of the repertoire) of each individual instance of that clone. Shannon's Entropies and Simpson's indices indicated are calculated from the repertoire of the CDR3 $\alpha$  and the CDR3 $\beta$  separately.

**Table 3. Hypervariable regions of IFN- $\gamma$  expressing T cells from B6.NOD-Aec1/2 mice**

| Sex | Age (wk) | T cell | TRAV  | CDR3 $\alpha$          | TRAJ | %   | TRBV | CDR3 $\beta$        | TRBD | TRBJ | %    |
|-----|----------|--------|-------|------------------------|------|-----|------|---------------------|------|------|------|
| M   | 64       | Th1    | 6-4   | CIGPSFPISFKGPTHVQYL    | 34   | 2.2 | 16   | CGGKRRLESIFR‡       | 2    | 1-7  | 22.2 |
| F   | 20       | Th1    | 8D-1  | CATDLNTGANTGKLTFG†     | 52   | 6.7 | 13-1 | CASSGGGTGQLYFG      | 1    | 2-2  | 3.7  |
| F   | 20       | Tc1    | 5-1   | CLLLVFLFFFFS           | 40   | 2.2 | 6    | CLFKEDNPSPF         |      |      | 3.7  |
| F   | 20       | Tc1    | 6-4   | CPHPRPSRLRVVLFSS       | 46   | 2.2 | 4    | CGPGQGWLGDPVILRAF   |      |      | 3.7  |
| F   | 20       | Th1    | 6N-7  | CENNTHYIRLDTVFS        | 36   | 2.2 | 7-5  | CGGGG**RIFKILEFG    | 2    | 1-1  | 3.7  |
| M   | 60       | Th1    | 7-4   | CPPPKLGVSLHLF*V*QSPFL  |      | 2.2 | 20   | CDLW                | 2    | 1-5  | 3.7  |
| F   | 20       | Th1    | 13D-1 | CRFSQKKLFIIGFLLGI*DEFG | 53   | 2.2 | 21   | CYRTSPHLFW          |      | 1-4  | 3.7  |
| F   | 20       | Th1    |       |                        |      |     | 23   | CRKLHSCATCALNFL     |      | 2-2  | 7.4  |
| M   | 64       | Tc1    |       |                        |      |     | 2-1  | CKGGVGVPSFFG        |      |      | 3.7  |
| M   | 64       | Th1    |       |                        |      |     | 3    | CINIR               |      | 2-2  | 3.7  |
| M   | 64       | Tc1    |       |                        |      |     | 3    | CPFG                |      | 2-6  | 3.7  |
| M   | 60       | Th1    |       |                        |      |     | 4    | CAHDWDSNHVHIVW      |      | 1-4  | 3.7  |
| M   | 60       | Th1    |       |                        |      |     | 8    | CAHGLGVPINVHIVW     | 1    | 1-4  | 3.7  |
| F   | 60       | Th1    |       |                        |      |     | 8    | CTFVLGSPNQGENCFG    |      |      | 3.7  |
| M   | 64       | Th1    |       |                        |      |     | 12-1 | CTPLFQ              |      | 1-6  | 3.7  |
| M   | 64       | Tc1    |       |                        |      |     | 12-2 | CRSKSNPLLSYITLFP    | 1    | 2-6  | 3.7  |
| M   | 64       | Tc1    |       |                        |      |     | 13-3 | CEALLSGEERLRVFS     |      |      | 3.7  |
| F   | 38       | Th1    |       |                        |      |     | 20   | CRQSLWANKKENHFF*KLW | 2    | 2-2  | 3.7  |
| F   | 20       | Tc1    |       |                        |      |     | 24   | CLGGIILFLW          | 2    |      | 3.7  |
| M   | 64       | Th1    |       |                        |      |     | 29   | CRYQHI*FC           |      | 1-6  | 3.7  |
| F   | 20       | Tc1    |       |                        |      |     | 30   | CCLDRFF             |      |      | 3.7  |
| F   | 20       | Th1    | 13D-2 | CVYLEHHE               | 23   | 4.4 |      |                     |      |      |      |
| M   | 64       | Th1    | 1     | CGGKRRIESISESMGFD      | 5    | 2.2 |      |                     |      |      |      |
| M   | 64       | Th1    | 2     | CALVWDSNHVHLFG         |      | 2.2 |      |                     |      |      |      |
| M   | 64       | Th1    | 2     | CPDCGCRISFG            | 28   | 2.2 |      |                     |      |      |      |
| M   | 64       | Th1    | 4     | CGPNKGDDWIR            | 48   | 2.2 |      |                     |      |      |      |
| M   | 64       | Th117  | 4N-4  | CFRPQPHRPWCAFG         | 44   | 2.2 |      |                     |      |      |      |
| M   | 64       | Th1    | 5     | CSPLPPPVAGQGRSL        | 2    | 2.2 |      |                     |      |      |      |
| F   | 60       | Th1    | 8     | CLGSNHGQLFG            | 38   | 2.2 |      |                     |      |      |      |
| F   | 60       | Th1    | 8     | CRDILLMVPIM*DCTRS      | 50   | 2.2 |      |                     |      |      |      |
| M   | 64       | Th1    | 11    | CAIPIFLVFLG            | 21   | 2.2 |      |                     |      |      |      |
| F   | 38       | Th1    | 16    | CSSGGGVVCGEPFG         |      | 2.2 |      |                     |      |      |      |
| F   | 38       | Tc1    | 17    | CPLPALV*ILL            | 1    | 2.2 |      |                     |      |      |      |
| M   | 64       | Th1    | 20    | CLCLLPGSCAFL           | 18   | 2.2 |      |                     |      |      |      |
| M   | 60       | Th1    | 6-4   | CPPR*CRF               | 50   | 2.2 |      |                     |      |      |      |
| F   | 20       | Tc1    | 6-5   | CSFTEIVW               | 52   | 2.2 |      |                     |      |      |      |
| F   | 60       | Th1    | 6-5   | CTWLESNHVQLFG          | 61   | 2.2 |      |                     |      |      |      |
| M   | 60       | Th1    | 6-7   | CKDKDGLAQEVMK          | 41   | 2.2 |      |                     |      |      |      |

|                           |    |     |       |                      |     |              |
|---------------------------|----|-----|-------|----------------------|-----|--------------|
| F                         | 20 | Tc1 | 6N-5  | CSCLSLALLLPAPLG      | 2-1 | 2.2          |
| M                         | 64 | Th1 | 7-3   | CRLPHMLPPSGPFG       | 48  | 2.2          |
| F                         | 20 | Th1 | 7-3   | CYPVGTRASFS          | 25  | 2.2          |
| F                         | 60 | Tc1 | 7D-6  | CGHDPHTP*TRAAIVMVLFW | 53  | 2.2          |
| M                         | 60 | Th1 | 7D-6  | CMTYLRVKGTSGL        | 2   | 2.2          |
| M                         | 64 | Th1 | 8-2   | CFFVFG               | 57  | 2.2          |
| F                         | 20 | Th1 | 9D-2  | CVMGVFQGVSRHRLFG     | 5   | 2.2          |
| F                         | 60 | Th1 | 9D-4  | CSRSNEVKMDF          | 23  | 2.2          |
| M                         | 64 | Th1 | 9N-3  | CGDPQNVGALFG         | 1   | 2.2          |
| M                         | 64 | Th1 | 10D   | CLILSSRRMSYLF        | 57  | 2.2          |
| F                         | 20 | Th1 | 12-1  | CFVFKENSG            | 42  | 2.2          |
| F                         | 60 | Th1 | 12-2  | CSGQNPLEN*TFL        | 16  | 2.2          |
| F                         | 60 | Th1 | 12-3  | CWLWQVSRTASPEK       | 23  | 2.2          |
| M                         | 64 | Tc1 | 12-3  | CQAEEQGTFR           |     | 2.2          |
| M                         | 64 | Tc1 | 13D-2 | CTPGVSPLSFR          | 59  | 2.2          |
| F                         | 38 | Tc1 | 13N-3 | CTVRIFALMIW          | 33  | 2.2          |
| M                         | 66 | Th1 | 14D-3 | CPDSNTF              | 36  | 2.2          |
| F                         | 60 | Th1 | 15D-1 | CGRPQRQAHAALF        |     | 2.2          |
| <b>Shannon's Entropy:</b> |    |     |       |                      |     | <b>5.34</b>  |
| <b>Simpson's Index:</b>   |    |     |       |                      |     | <b>0.004</b> |
|                           |    |     |       |                      |     | <b>3.95</b>  |
|                           |    |     |       |                      |     | <b>0.063</b> |

Listed are translated CDR3 amino acid sequences from IFN- $\gamma$  producing T cells isolated from the B6.NOD-*Aec1/2* mice indicating the Sex, Age (in weeks), T cell (Th indicates CD4 expression, Tc indicates CD8 expression), TRAV (unambiguous IMGT gene name of the TRAV), TRAJ, TRBV, TRBJ and the % (percent of the repertoire) of each individual instance of that clone. Shannon's Entropies and Simpson's indices indicated are calculated from the repertoire of the CDR3 $\alpha$  and the CDR3 $\beta$  separately. †Indicates a CDR3 sequence generated from noncongruent DNA sequences. ‡Indicates a CDR3 sequence generated from multiple V/J gene segment combinations and noncongruent DNA sequences.

**Table 4. Hypervariable regions of IL-17A expressing T cells from B6.NOD-Aec1/2 mice**

| Sex                       | Age (wk) | T cell | TRAV       | CDR3 $\alpha$      | TRAJ | %   | TRBV | CDR3 $\beta$           | TRBD         | TRBJ | %    |  |
|---------------------------|----------|--------|------------|--------------------|------|-----|------|------------------------|--------------|------|------|--|
| M                         | 64       | Th17   | 6          | CLVGTQSRALFG       | 1    | 6.7 | 16   | CGGKRRLESIFR‡          | 2            | 1-7  | 12.5 |  |
| F                         | 20       | Tc17   | 16         | CFIFLFC            |      | 6.7 | 5    | CYEEGSESGPFFG          |              |      | 6.3  |  |
| F                         | 20       | Th17   | 18         | CESRNTVSHRNERTLHFG | 2    | 6.7 | 6-3  | CDIGAFHIWPFQGLFR       |              | 1-4  | 6.3  |  |
| F                         | 38       | Th17   | 6-4        | CSSTLTLKLMCFFFG    | 26   | 6.7 | 15   | CQQTEKGGGAQNGGRP       |              | 2-3  | 6.3  |  |
| F                         | 20       | Tc17   | 12-2       | C*SAIAGIFLGPFG     | 2    | 6.7 | 23   | CTQWQRPPNVKGVFL        | 2            | 2-2  | 6.3  |  |
| F                         | 20       | Th17   |            | CTSGAACFL          |      | 6.7 | 24   | CVPGQRRARVLSRRFL       |              | 2-7  | 6.3  |  |
| F                         | 20       | Th17   |            |                    |      |     | 2    | CCLVFFFFC              |              |      | 6.3  |  |
| F                         | 20       | Th17   |            |                    |      |     | 3    | CYSGGPPRVLQKGREKKEGIFL |              | 1-7  | 6.3  |  |
| F                         | 38       | Tc17   |            |                    |      |     | 8    | CT*LEPKKSAMFW          | 2            | 2-4  | 6.3  |  |
| M                         | 64       | Th17   |            |                    |      |     | 14   | CHYPELVCFW             |              | 1-1  | 6.3  |  |
| F                         | 20       | Th17   |            |                    |      |     | 24   | CFLCPFG                |              | 1-4  | 6.3  |  |
| F                         | 20       | Th17   |            |                    |      |     | 29   | CEVPGFL                |              | 2-3  | 6.3  |  |
| F                         | 20       | Tc17   |            |                    |      |     | 30   | CMEGMGILEARYLWG        |              | 2-4  | 6.3  |  |
| F                         | 20       | Tc17   |            |                    |      |     | 12-1 | CSIAATLVGHRKQPYFW      | 2            |      | 6.3  |  |
| F                         | 20       | Th17   |            |                    |      |     | 13-2 | CSYRTTYVFG             | 2            | 2-7  | 6.3  |  |
| M                         | 64       | Th17   | 4-3        | CCGDRPSKMMIF       | 50   | 6.7 |      |                        |              |      |      |  |
| M                         | 60       | Th17   | 7          | CCQRA*SFL          | 32   | 6.7 |      |                        |              |      |      |  |
| M                         | 64       | Th17   | 6N-7       | CPSLKLHLVVKPYFL    | 60   | 6.7 |      |                        |              |      |      |  |
| F                         | 20       | Tc17   | 6N-7       | CDSRIAVIFLDRLAHL   | 2    | 6.7 |      |                        |              |      |      |  |
| F                         | 20       | Th17   | 6-7/DV9    | CMGSFAQLGRFG       | 47   | 6.7 |      |                        |              |      |      |  |
| M                         | 52       | Th17   | 12-3       | CTHDSLFG           | 52   | 6.7 |      |                        |              |      |      |  |
| M                         | 52       | Th17   | 15-1/DV6-1 | CNPVYGPSTFW        | 24   | 6.7 |      |                        |              |      |      |  |
| F                         | 20       | Tc17   |            | CRPDITLSPETPFL     |      | 6.7 |      |                        |              |      |      |  |
| M                         | 64       | Th17   |            | CSALPRG*PLW        |      | 6.7 |      |                        |              |      |      |  |
| <b>Shannon's Entropy:</b> |          |        |            | <b>3.91</b>        |      |     |      |                        | <b>3.88</b>  |      |      |  |
| <b>Simpson's Index:</b>   |          |        |            | <b>0.000</b>       |      |     |      |                        | <b>0.008</b> |      |      |  |

Listed are translated CDR3 amino acid sequences from IL-17A producing T cells isolated from the B6.NOD-Aec1/2 mice indicating the Sex, Age (in weeks), T cell (Th indicates CD4 expression, Tc indicates CD8 expression), TRAV (unambiguous IMGT gene name of the TRAV), TRAJ, TRBV, TRBJ and the % (percent of the repertoire) of each individual instance of that clone. Shannon's Entropies and Simpson's indices indicated are calculated from the repertoire of the CDR3 $\alpha$  and the CDR3 $\beta$  separately. ‡Indicates a CDR3 sequence generated from multiple V/J gene segment combinations and noncongruent DNA sequences.

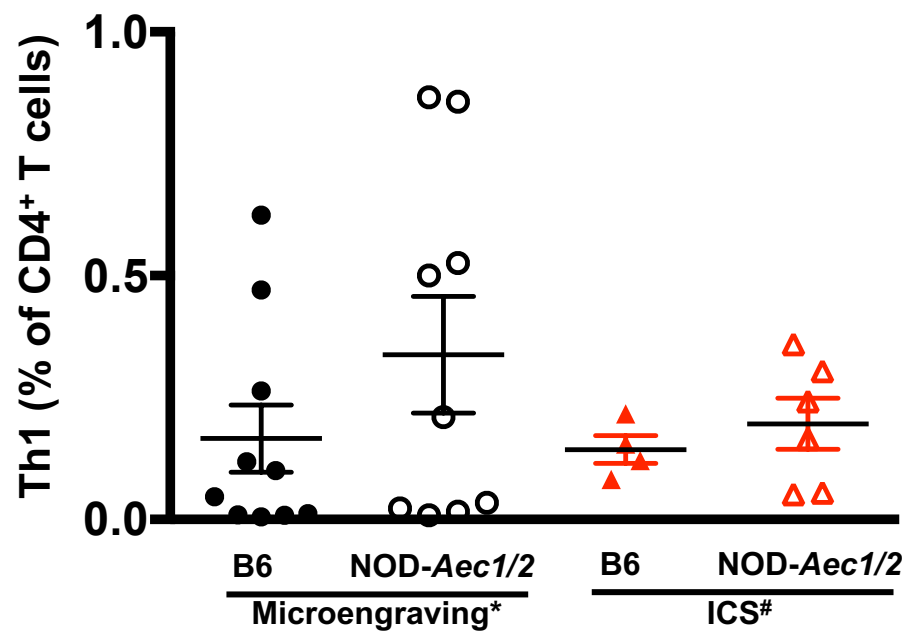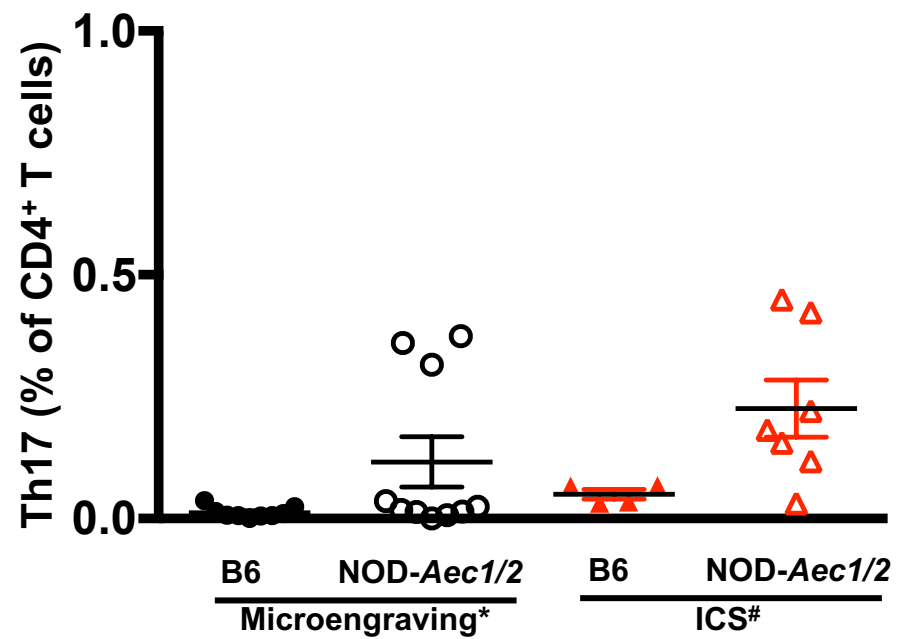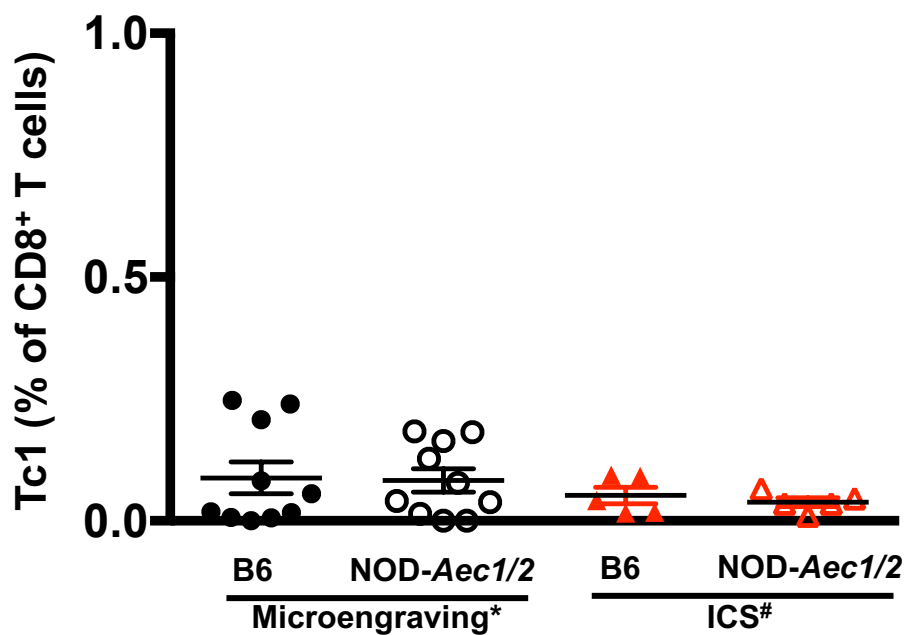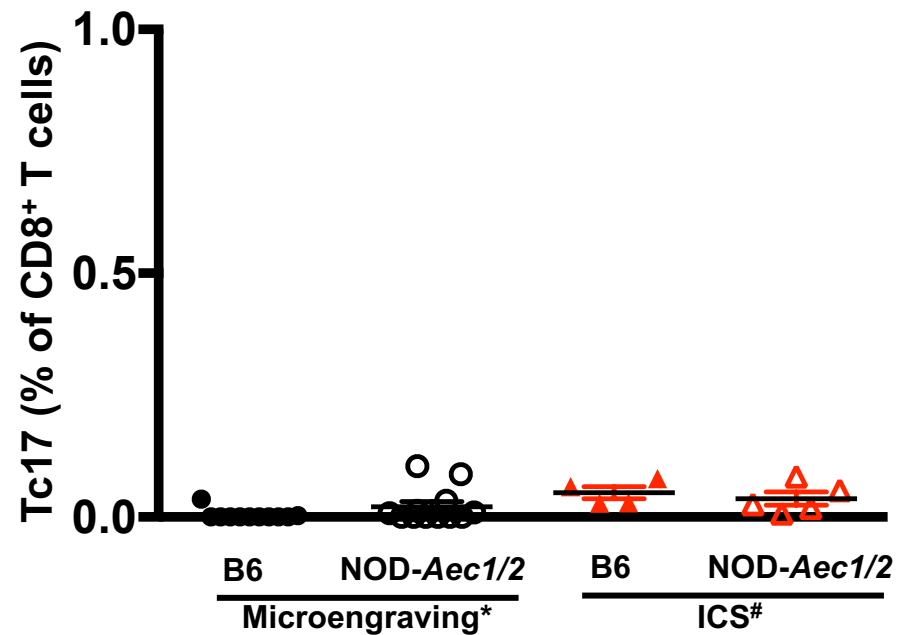



**Supplementary Fig. S1. Similar frequency/trend of cytokine secretion by microengraving and direct *ex-vivo* ICS.** Microengraving was performed as stated in Methods section. The frequency in percentage of microengraving was determined by using the percentage (multiplied by 100) of the total number of Th1 or Th17 cells from wells with single live cells among the total number of wells with single CD4<sup>+</sup> or CD8<sup>+</sup> cells. <sup>#</sup>Direct *ex-vivo* ICS involves stimulation of salivary gland lymphocytes for 4 hour under PMA/Iono stimulation in the presence of GolgiPlug containing Brefeldin A solution (BD Biosciences). Flow cytometry was used to analyze for CD3, CD4, CD8, IL-17A, and IFN- $\gamma$  secretion. The frequency in percentage was determined by using the percentage (multiplied by 100) of the total number of Th1 or Th17 cells from wells with single live cells among the total number of wells with single CD4<sup>+</sup> or CD8<sup>+</sup> cells.

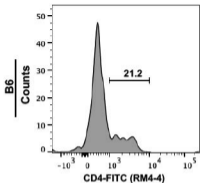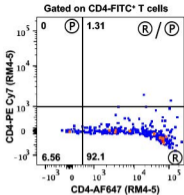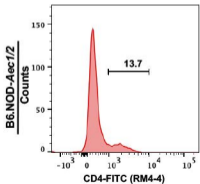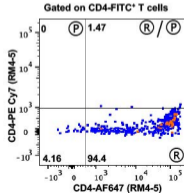

### **Supplementary Fig. S2. Tissue- and peripheral-resident CD4<sup>+</sup>T cells**

**discrimination.** Anti-CD4-PE-Cy7 (3µg, clone RM4-5, BD Pharmingen) was injected via tail veins of B6 (n=2) or B6.NOD-*Aec1/2* mice (n=2). After 10 minutes, mice were euthanized and salivary glands were collected and rinsed in phosphate buffered saline (PBS) for three times, 5 minutes each. Single-cell suspension was isolated as previously described <sup>1</sup> with digestion buffer saturated with 3µg of biotinylated anti-CD4 (clone RM4-5, BD Pharmingen). Cells were subsequently stained for anti-CD4 FITC (clone RM4-4) and Streptavidin AF-647. ®: Resident CD4<sup>+</sup> T cells, ©: Peripheral CD4<sup>+</sup> T cells. The experiment was repeated three times for consistency. Representative experiment using a B6.NOD-*Aec1/2* mouse was presented.

1 Voigt, A. *et al.* Sexual dimorphic function of IL-17 in salivary gland dysfunction of the C57BL/6.NOD-*Aec1Aec2* model of Sjogren's syndrome. *Scientific reports* **6**, 38717, doi:10.1038/srep38717 (2016).
